## ***Interactions among 17 respiratory pathogens: a cross-sectional study using clinical and community surveillance data***

*Authors:* Roy Burstein<sup>1,#</sup>,  
Benjamin M. Althouse<sup>1,11,12</sup>,  
Amanda Adler<sup>2</sup>,  
Adam Akullian<sup>1</sup>,  
Elizabeth Brandstetter<sup>3</sup>,  
Shari Cho<sup>4</sup>,  
Anne Emanuels<sup>3</sup>,  
Kairsten Fay<sup>5</sup>,  
Luis Gamboa<sup>4</sup>,  
Peter Han<sup>4</sup>,  
Kristen Huden<sup>3</sup>,  
Misja Ilcisin<sup>5</sup>,  
Mandy Izzo<sup>1</sup>,  
Michael L. Jackson<sup>6</sup>,  
Ashley E. Kim<sup>3</sup>,  
Louise Kimball<sup>5</sup>,  
Kirsten Lacombe<sup>2</sup>,  
Jover Lee<sup>5</sup>,  
Jennifer K. Logue<sup>3</sup>,  
Julia Rogers<sup>3</sup>,  
Erin Chung<sup>13</sup>,  
Thomas R. Sibley<sup>5</sup>,  
Katrina Van Raay<sup>4</sup>,  
Edward Wenger<sup>1</sup>,  
Caitlin R. Wolf<sup>3</sup>,  
Michael Boeckh<sup>3,4,5</sup>,  
Helen Chu<sup>3,5</sup>,  
Jeff Duchin<sup>3,7</sup>,  
Mark Rieder<sup>4</sup>,  
Jay Shendure<sup>4,8,10</sup>,  
Lea M. Starita<sup>4,8</sup>,  
Cecile Viboud<sup>9</sup>,  
Trevor Bedford<sup>4,5,10</sup>,  
Janet A. Englund<sup>2,4</sup>,  
Michael Famulare<sup>1</sup>,  
On behalf of the Seattle Flu Study and SCAN Investigators

### **Affiliations**

1 Institute for Disease Modeling, Bill & Melinda Gates Foundation, Seattle WA USA

2 Seattle Children's Research Institute, Seattle WA USA

3 Department of Medicine, University of Washington, Seattle WA USA

4 Brotman Baty Institute for Precision Medicine, Seattle WA USA

5 Vaccine and Infectious Disease Division, Fred Hutchinson Cancer Research Center, Seattle WA USA

6 Kaiser Permanente Washington Health Research Institute, Seattle WA USA

7 Public Health Seattle & King County, Seattle WA USA

8 Department of Genome Sciences, University of Washington, Seattle WA USA

9 Division of International Epidemiology and Population Studies, Fogarty International Center, National Institutes of Health, Bethesda, MD, USA.

10 Howard Hughes Medical Institute, Seattle WA USA

11 Institute for Disease Modeling, Bill & Melinda Gates Foundation, Seattle WA USA

12 Department of Biology, New Mexico State University, Las Cruces, NM

13 Department of Pediatrics, University of Washington, Seattle Children's Hospital, Seattle

### **Corresponding author information**

# Roy.Burstein@gatesfoundation.org

### **Conflicts of interest**

JAE receives research support from AstraZeneca, GlaxoSmithKline, Merck, and Pfizer, and is a consultant for SanofiPasteur, Meissa Vaccines, and Teva Pharmaceuticals. MLJ has received research support from Sanofi Pasteur. All other authors declare no conflicts of interest.

### **Acknowledgements**

We would like to thank the Seattle Flu Study and SCAN participants for their invaluable contributions to this research, and the entire Seattle Flu Study team for making this study possible. The Seattle Flu Study and SCAN are administered by the Brotman Baty Institute for Precision Medicine and funded by Gates Ventures, the private office of Bill Gates. JS is an Investigator of the Howard Hughes Medical Institute. RB and MF are employees of the Institute for Disease Modeling, a research group within, and solely funded by, the Bill and Melinda Gates Foundation. T.B. is supported by NIH R35 GM119774.

Ethics Approval: The Seattle Flu Study received approval by the University of Washington's Institutional Review Board at the (UW IRB; STUDY00006181) and informed consent was obtained prior to study enrollment.

Participants participated in SCAN as part of public health

### **Author Contributions**

Conceived and designed the study: RB, MF

Collected or curated the data: TB, KF, AA, EB, SC, AE, MLJ, AEK, KL, JL, JKL, JR, TRS, KVR, HC, MR, JS, LMS, JAE

Conducted the analysis: RB

Advised on the analysis: AA, BMA, MF, JAE, EW, TB, MLJ, CV

Drafted the manuscript: RB, BMA, MF

Reviewed and edited the manuscript: All

Secured funding: MB, TB, HC, JD, JAE, MF, MR, LMS, CV, JS

## Abstract

### *Background*

Co-circulating respiratory pathogens can interfere with or promote each other, leading to important effects on disease epidemiology. Estimating the magnitude of pathogen-pathogen interactions from clinical specimens is challenging because sampling from symptomatic individuals can create biased estimates.

### *Methods*

We conducted an observational, cross-sectional study using samples collected by the Seattle Flu Study between 11 November 2018 and 20 August 2021. Samples that tested positive via RT-qPCR for at least one of 17 potential respiratory pathogens were included in this study. Semi-quantitative cycle threshold (Ct) values were used to measure pathogen load. Differences in pathogen load between monoinfected and coinfecting samples were assessed using linear regression adjusting for age, season, and recruitment channel.

### *Results*

21,686 samples were positive for at least one potential pathogen. Most prevalent were rhinovirus (33.5%), *Streptococcus pneumoniae* (*SPn*, 29.0%), SARS-CoV-2 (13.8%) and influenza A/H1N1 (9.6%). 140 potential pathogen pairs were included for analysis, and 56 (40%) pairs yielded significant Ct differences ( $p < 0.01$ ) between monoinfected and co-infected samples. We observed no virus-virus pairs showing evidence of significant facilitating interactions, and found significant viral load decrease among 37 of 108 (34%) assessed pairs. Samples positive with *SPn* and a virus were consistently associated with increased *SPn* load.

### *Conclusions*

Viral load data can be used to overcome sampling bias in studies of pathogen-pathogen interactions. When applied to respiratory pathogens, we found evidence of viral-*SPn* facilitation and several examples of viral-viral interference. Multipathogen surveillance is a cost-efficient data collection approach, with added clinical and epidemiological informational value over single-pathogen testing, but requires careful analysis to mitigate selection bias.

## Introduction

The human respiratory tract hosts a complex community of co-circulating pathogens and commensal bacteria. Competition for resources and modification of the host environment can act to inhibit or support pathogen replication, which can alter the natural history and severity of disease and ultimately impact population epidemiology.<sup>1-6</sup> Furthermore, as multi-pathogen molecular testing becomes more common, increased understanding of coinfections will improve care at the bedside.

While literature on the interactions between pathogen pairs is mixed, viral-bacterial interactions are thought to be favorable for bacterial proliferation while viral-viral interactions are often considered inhibitory to replication. In particular, *Streptococcus pneumoniae* (SPn) colonization or increased proliferation following influenza infection is well documented,<sup>7,8</sup> and evidence for similar facilitation following other respiratory viral infections exists.<sup>9,10</sup> Pathogen interactions have typically been studied through laboratory experiments,<sup>11-14</sup> animal models,<sup>15-20</sup> and via transmission modeling,<sup>5,21-25</sup> which have revealed important interspecific nuances within viral and bacterial pathogen relationships. While viral-viral interference is generally expected via innate immune responses, this generality does not always hold.<sup>20</sup>

Laboratory experiments studies are extremely useful but are laborious and costly. Epidemiological studies using multiplexed or arrayed polymerase chain reaction (PCR)-based techniques have explored pathogen-pathogen interactions based on their relative risk of co-occurrence; i.e., if two viruses co-occur less often than chance would predict, viral interference is concluded.<sup>13,26,27</sup> However, such studies are prone to Berkson's bias, a form of selection bias where under-representation of non-infected samples in clinical data will lead to spuriously low relative risks.<sup>28-30</sup>

Here, we develop a new approach for analyzing pathogen-pathogen interactions based on detecting differences among semi-quantitative measurements of pathogen load. This approach overcomes a number of shortcomings inherent to previous approaches based on binary co-occurrence in non-random samples by focusing on a within-subject measure of pathogen interaction, thus directly quantifying the direction and strength of interaction. We apply this method to a large sample of arrayed PCR data covering 17 potential pathogens or pathogen groupings from a large number of clinical samples collected by the Seattle Flu Study, a community-based respiratory surveillance platform.

## Methods

This study uses cross-sectional data collected through the Seattle Flu Study (SFS), including from the greater Seattle Coronavirus Assessment Network (SCAN). Participants enrolling in cross-sectional arms of SFS between 11 November, 2018 to 20 August, 2021 were eligible for this study. As previously described,<sup>31,32</sup> nasal swab specimens were collected from individuals who self-reported at least two new or worsening symptoms of acute respiratory illness (ARI) or a new or worsening cough alone. Self-administered mid-turbinate or anterior nares swabs were collected at community sites including but not limited to transit stations, outpatient clinics, and at-home swab collection<sup>33</sup>. Residual specimens from patients tested for suspected respiratory infection at four regional hospitals were also collected. Only the first positive sample from each individual was used in this analysis. Participant age and date of swab collection were recorded for each specimen. Only samples tested for all included pathogens were retained, with the exception of SARS-CoV-2, which was not tested prior to 2020. **Supplementary Table 1** lists the recruitment sites used in this study. This study followed the STROBE and STROME-ID reporting guidelines.<sup>34,35</sup>

Each specimen was screened for a panel of potential respiratory pathogens in duplicate using a custom TaqMan OpenArray RT-PCR platform (Thermo Fisher).<sup>32,36</sup> The following pathogen targets were included in this study: adenovirus (AdV); human coronaviruses (CoVs) 229E and OC43, HKu1 and NL63; human metapneumovirus (hMPV); human parainfluenza viruses (hPIV) 1 and 2, and hPIV 3 and 4; influenza A (IAV) H1N1 and H3N2; pan influenza B (IBV); pan influenza C (ICV); respiratory syncytial viruses (RSV) A and B; human rhinoviruses (RV); enterovirus D68 (EV.D68); pan enterovirus excluding D68 (EV); and *Streptococcus pneumoniae* (SPn). Specimens collected after 01-Jan-2020 were also tested for SARS-CoV-2 using a separate quantitative-PCR (qPCR) assay, previously described.<sup>31</sup> SARS-CoV-2 Ct values were obtained by averaging two Ct values for the Orf1b gene primer. About 10% of SARS-CoV-2 samples were tested using a research-only OpenArray assay instead. We note that because of assay limitations, epidemiologically distinct strains were grouped into one assay each for CoV, hPIV, and RV. For conciseness, we refer to these pathogen groupings, and the potential pathogens AdV, RV, and SPn that may not be indicative of disease, simply as pathogens.

### *Measurement of pathogen load*

For pathogens tested by OpenArray (all except SARS-CoV-2), a relative threshold value (Crt) was computed for each positive result.<sup>36–38</sup> Crts have a similar interpretation to qPCR cycle threshold (Ct) values as an inverse-proxy of viral or bacterial load in a sample, wherein lower values correspond to fewer cycles to reach a sufficient OpenArray signal, with each cycle roughly equivalent to a 2-fold reduction in genomic copies.<sup>36,37</sup> For analysis of SARS-CoV-2, both Ct and Crt values were used, depending on the assay used (qPCR or OpenArray). We will refer to all cycle values generically as Ct.

### *Statistical Analysis*

For each pathogen-pathogen pair, we computed the average Ct difference between monoinfected and coinfecting samples. For example, to test the effect of RSV-A on IAV-H1N1 infection, we compared the mean difference in H1N1 Ct values between samples that were only positive for H1N1 and samples that were positive for both H1N1 and RSV-A. Likewise, to test the effect of H1N1 on RSV-A (notated as H1N1→RSV-A), we compared the Ct values between samples with only RSV-A detected and the RSV-A Cts for samples showing co-infection with H1N1. This was done for each pathogen-pathogen pair with sufficient sample size.

To control for potential confounding we tested Ct differences using linear regression, including age category (<1, 1-4, 5-17, 18-49, 50-64, 65+ years), calendar time (fixed effects for each year-month to account for non-linear trends), and recruitment mode category (community, outpatient clinic (kiosk), outpatient clinic (residual), and hospital residual) as control variables. For SARS-CoV-2, we also controlled for the assay used. Each pathogen comparison pair was run as an independent regression, and only samples either singly or coinfecting were included. For example, to test the effect of RSV-A on H1N1 Ct, only samples that were either positive only for H1N1 or that were positive for RSV-A and H1N1 were included and H1N1 Ct values were used as the dependent variable:

$$H1N1\ Ct\ values = \beta_0 + \beta_c\ Coinf\_RSVA + \beta_a\ age + \beta_{ym}\ year.\ month + \beta_r\ recruitment + \epsilon$$

where *Coinf\_RSVA* is a dummy variable indicating whether the sample was coinfecting with RSV-A (0/1 for monoinfected/coinfecting), and  $\beta_c$  represents the average adjusted Ct value difference by which coinfecting samples differ from monoinfected samples. Since Ct values are on an exponential scale and inverse to viral load, a coefficient of -1 represents approximately a two-fold average increase in genetic material in coinfecting samples relative to monoinfected samples, suggesting a facilitating relationship. A coefficient of +4 represents an average of approximately a  $2^4 = 16$ -fold decrease, suggesting interference. A p-value threshold of 0.01 was used for reporting significance to mitigate spurious significant findings across many pathogen pairs and we limited analysis to pairs with greater than 10 coinfections and 10 single infections.

We tested overall viral interaction effects similarly. For each pathogen, we tested the mean Ct interaction effect on all other viruses (ex. H1N1→All viruses), as well as the mean effect of all viruses on each pathogen (ex. All viruses → H1N1). For the former, we included virus-specific fixed effects in each regression to control for baseline differences in Ct across viruses.

All analyses were performed using R version 4.1.2. Analysis code to be posted at <https://github.com/InstituteForDiseaseModeling/SFS-coinfection-interactions>

#### *Ethics approval statement*

This study was approved by the University of Washington Institutional Review Board, with reliance from Fred Hutchinson and Seattle Children's Hospital.

## Results

Of 115,087 samples collected and tested for multiple pathogens between 11 November, 2018 and 20 August, 2021, 32,894 (28.6%) were positive for at least one of the 17 pathogens included in this study. After exclusion of data from cohort sub-studies, multiple testing of individuals in cross-sectional data, and samples missing metadata, 21,686 positive samples and 27,422 total infection cases were retained for analysis. 11,182 (51.5% of total) positive samples were from hospital residuals, 7,633 (35.2%) from community testing (including 5720 from SCAN), and 2871 (13.2%) were from outpatient clinics. Among positive samples, the most prevalent pathogen was RV, present in 33.5% (N=7278) of samples, followed by *SPn*, a common commensal with the ability to cause disease, present in 29.0% (N=6293) of samples. Other common pathogens were SARS-CoV-2 (13.8%), IAV-H1N1 (9.6%), and IBV (7.8%). Of the positive samples, 16,692 (77.0%) had only one pathogen detected, while 4207 (19.4%) had two, 693 (3.2%) had three, and 94 (0.4%) had four or more. The most commonly co-occurring pathogen pair was *SPn* and RV, co-appearing in 1461 observations, followed by *SPn* and AdV (N=487), and *SPn* and RSV-A (N=423).

Average Ct values vary across pathogens, but in the absence of standardization, Ct values are not comparable across targets. *SPn* had the largest observed difference in Ct between monoinfected samples (20.7) and coinfecting samples (17.9) (**Table 1**). Samples from hospitals and clinics generally had lower average Cts compared with community samples. For example, IAV-H1N1 community samples had an average Ct of 20.0, versus 16.3 from hospital samples. Ct was distributed differentially across ages by pathogen (**Figure 1**). Many pathogens, such as RSV-A, RSV-B, and IAV-H1N1 had lower average Ct values for children and elderly. Other pathogens, such as the seasonal coronaviruses, had flatter Ct distributions across ages. Children had higher prevalence of pathogen and coinfection detection than adults (**Supplementary figure 2**): of 6877 positive samples from children under 5 (representing 61.5% of our sample), 4732 (68.8%) were positive for multiple pathogens, while of 7177 samples from adults 18-49, only 836 (11.7%) were coinfections.

Most samples come from the 2018-19 and 2019-20 winter seasons, when a large variety of respiratory pathogens were co-circulating (**Figure 2**). Each season had distinct characteristics. The 2018-19 influenza season was dominated by the A/H3N2 subtype, while the 2019-20 season had minimal circulation of A/H3N2 and was instead characterized by considerable IBV transmission. At the outset of the COVID-19 pandemic in March 2020, large-scale non-pharmaceutical interventions interrupted transmission of nearly all respiratory pathogens, with the exception of RV, *SPn*, AdV, and SARS-CoV-2, until February 2021, when other respiratory viruses began to reappear.

Of a total of 272 possible pathogen pairs for comparison, 132 had fewer than 10 coinfecting samples, leaving a total of 140 pairs for testing. Of those, 56 (40%) pairs yielded absolute Ct differences that were significant at a 0.01 level (**Figure 3, Supplementary Data**). Ct differences ranged from -3 for (hMV and ICV) → *SPn* to +7 for IAV H1N1 → hMPV and (EV and IBV) → AdV. With the exception of *SPn*, there were no significant decreases in the Ct of any pathogen-pathogen pair. Samples positive with *SPn* and a virus were consistently significantly associated with decreased *SPn* Ct (in 12 of 16 viruses), with the exception of EV D68, EV, IAV H3N2, and hPIV 1-2. In contrast, Ct values for viruses

were generally higher in samples coinfecting with *SPn* than those without, significantly so for RV, IAV H1N1, RSV A, hMPV, hPIV 1 and 2, and all 4 seasonal CoVs.

We observed no virus-virus pairs that were significantly associated with decreased Ct during coinfection (which would be suggestive of facilitation), but found significant increases in Ct (suggestive of interference) among 37 of 108 (34%) of assessed pairs. Averaged viral interactions (shown on the left and bottom margins of Figure 3) reflected this trend as well. Coinfection with IAV and IBV was consistently associated with increased Ct in most other viruses (14 of 21 pairs), while coinfection with other viruses was associated with small or insignificant differences in IAV or IBV Ct values (2 of 21 pairs significant). The average virus had a +4 Ct value when coinfecting with either IAV subtype or IBV, while we observed no significant change in either IAV or IBV when coinfecting with other viruses, on average. Conversely, significant increases in the average Cts of CoVs were commonly observed when coinfecting with other viruses (a +3 increase on average across all viral coinfections), but these viruses were not typically associated with large differences in the Cts of other viruses when coinfecting (no individual significant interactions for the HKU1/NL63 target nor on average across all viruses, and 229E/OV43 only yielding a significant effect when coinfecting with RV).

*SPn*, RV, and AdV were the only pathogens observed to co-occur in more than 10 samples with SARS-CoV-2, with 116, 90, and 10 co-occurrences, respectively. Of the individual six pairs tested, SARS-CoV-2 → *SPn* and SARS-CoV-2 → RV yielded significant results, with average Ct differences of -1.9 (suggestive of SARS-CoV-2 facilitating *SPn* replication) and +3.3 (suggestive of SARS-CoV-2 interfering with RV infection). Estimates of average viral interactions with SARS-CoV-2 are largely informed by RV and reflect this same trend: no change in SARS-CoV-2 Ct when coinfecting, and a significant interfering effect on other viruses.



**Table 1:** Sample characteristics.

<https://docs.google.com/spreadsheets/d/12C12sFn6QJdiMgq3aBavEukFf883unh9RDjR8kqWn5s/edit?usp=sharing>

|                           | Adenovirus              | Seasonal Coronavirus |                   | Enterovirus     |                | Metapneumovirus | Parainfluenza   |                 | Influenza A      |                 | Influenza B      | Influenza C     | Respiratory syncytial virus |                 | Rhinovirus       | Coronavirus (2019) | Strep. Pneumoniae |
|---------------------------|-------------------------|----------------------|-------------------|-----------------|----------------|-----------------|-----------------|-----------------|------------------|-----------------|------------------|-----------------|-----------------------------|-----------------|------------------|--------------------|-------------------|
|                           | AdV                     | CoV 229E and OC43    | CoV HKU1 and NL63 | EV              | EV D68         | hMPV            | hPIV 1 and 2    | hPIV 3 and 4    | IAV H1N1         | IAV H3N2        | IBV              | ICV             | RSV A                       | RSV B           | RV               | SARS-CoV-2         | SPn               |
| <b>Overall</b>            |                         |                      |                   |                 |                |                 |                 |                 |                  |                 |                  |                 |                             |                 |                  |                    |                   |
| <b>All Samples</b>        | 20.9 (sd: 6.3, N: 1484) | 16.4 (6.3, 1022)     | 18 (5.5, 981)     | 23.3 (3.2, 231) | 19.1 (6.3, 76) | 16.1 (5.5, 910) | 18.1 (5.5, 290) | 15.4 (6, 697)   | 17.3 (5.2, 2074) | 15.6 (5.4, 896) | 14.1 (5.6, 1597) | 17.6 (6.8, 194) | 14.6 (5.7, 1079)            | 15.6 (5.7, 632) | 18.9 (5.6, 7267) | 21.1 (7.7, 1699)   | 19 (5.2, 6293)    |
| <b>Coinfection status</b> |                         |                      |                   |                 |                |                 |                 |                 |                  |                 |                  |                 |                             |                 |                  |                    |                   |
| <b>Monoinfection</b>      | 21.1 (6.2, 644)         | 15.7 (6.1, 652)      | 17.3 (5.4, 607)   | 23.3 (3.2, 141) | 19.8 (6, 37)   | 15.8 (5.3, 565) | 17.1 (5.4, 187) | 15 (5.9, 380)   | 17.4 (5.3, 1570) | 15.5 (5.3, 674) | 14.1 (5.6, 1041) | 16.3 (6.7, 83)  | 14.4 (5.6, 495)             | 15.2 (5.5, 349) | 18.7 (5.7, 5217) | 21.2 (7.7, 1496)   | 20.7 (4.8, 2554)  |
| <b>Coinfection</b>        | 20.8 (6.4, 840)         | 17.5 (6.5, 370)      | 19.2 (5.5, 374)   | 23.2 (3.4, 90)  | 18.5 (6.6, 39) | 16.5 (5.6, 345) | 20 (5.3, 103)   | 15.8 (6.1, 317) | 16.8 (5.1, 504)  | 15.7 (5.5, 222) | 14.1 (5.5, 556)  | 18.5 (6.7, 111) | 14.6 (5.8, 584)             | 16 (5.8, 283)   | 19.3 (5.3, 2050) | 20.1 (7.7, 203)    | 17.9 (5.2, 3739)  |
| <b>Age</b>                |                         |                      |                   |                 |                |                 |                 |                 |                  |                 |                  |                 |                             |                 |                  |                    |                   |
| <b>&lt;1</b>              | 19.1 (5.9, 229)         | 14.5 (6.5, 85)       | 18.1 (5.8, 82)    | 23.3 (2.9, 28)  | 26.9 (0.4, 4)  | 15.1 (5.8, 89)  | 14.5 (4.3, 19)  | 14.8 (6, 98)    | 13.6 (4.5, 92)   | 13.5 (7.4, 9)   | 12.7 (5.1, 71)   | 17.4 (7.3, 22)  | 12.7 (5, 244)               | 12.1 (4.6, 106) | 18.2 (5.3, 689)  | 16.4 (8.2, 54)     | 17.4 (4.4, 714)   |
| <b>1-4</b>                | 20.3 (6.3, 596)         | 15.5 (6.8, 199)      | 18.3 (5.7, 196)   | 22.8 (3.7, 82)  | 21.7 (5.3, 7)  | 15.3 (5.2, 270) | 17.9 (5.2, 113) | 14.5 (6, 278)   | 15.7 (4.8, 270)  | 15 (4.8, 85)    | 13.8 (5, 296)    | 18.4 (6.8, 81)  | 13.8 (5.7, 428)             | 15 (5.6, 189)   | 17.9 (5.5, 1969) | 19.4 (7.8, 168)    | 17.9 (5.1, 2358)  |
| <b>5-17</b>               | 20.5 (6.9, 220)         | 17.5 (6.2, 119)      | 17.5 (5.8, 140)   | 22.8 (3.4, 49)  | 19.6 (7.8, 10) | 16.2 (5.8, 123) | 18 (5.6, 62)    | 15.9 (6.2, 101) | 15.6 (4.7, 470)  | 14.7 (4.9, 192) | 13.1 (5.3, 662)  | 18 (6.6, 31)    | 16.1 (5.9, 139)             | 17.3 (5.6, 49)  | 18.6 (5.5, 1450) | 19.5 (7.6, 330)    | 19.6 (5.2, 1259)  |
| <b>18-49</b>              | 22.9 (5.7, 320)         | 16.5 (6, 368)        | 18 (5.3, 376)     | 23.7 (2.7, 39)  | 18.7 (6.3, 37) | 17.4 (5.4, 227) | 19.9 (5.6, 57)  | 17.4 (5.5, 119) | 18.4 (5.2, 748)  | 15.9 (5.3, 320) | 15.4 (5.9, 480)  | 14.9 (6.5, 40)  | 17.3 (5.6, 130)             | 17.8 (5.4, 122) | 19.5 (5.7, 2479) | 22 (7.6, 823)      | 21.1 (5, 1249)    |
| <b>50-64</b>              | 22.4 (6, 77)            | 17.2 (5.9, 151)      | 17.7 (5.1, 127)   | 24.5 (2.7, 20)  | 17.9 (5.3, 13) | 16.4 (4.8, 103) | 18.4 (5.7, 22)  | 15.2 (5.6, 53)  | 18.9 (5.2, 325)  | 17 (5.6, 148)   | 16.1 (5.9, 58)   | 19.4 (6.7, 15)  | 15.9 (5.3, 79)              | 16.9 (5.4, 91)  | 20.2 (5.4, 443)  | 21.6 (7.6, 200)    | 19.7 (5.2, 498)   |

|                                |                 |                 |                 |                 |                |                 |                |                 |                  |                 |                  |                 |                 |                 |                  |                 |                  |
|--------------------------------|-----------------|-----------------|-----------------|-----------------|----------------|-----------------|----------------|-----------------|------------------|-----------------|------------------|-----------------|-----------------|-----------------|------------------|-----------------|------------------|
| <b>65+</b>                     | 24.1 (4, 42)    | 16.6 (6.2, 100) | 18.7 (5.9, 60)  | 24.9 (1.9, 13)  | 15.3 (5.8, 5)  | 15.5 (5.6, 98)  | 17.3 (6.1, 17) | 15.8 (6.2, 48)  | 18 (5, 169)      | 14.9 (5.8, 142) | 15.6 (5.9, 30)   | 17.5 (5.3, 5)   | 15.9 (6.1, 59)  | 15.4 (5.5, 75)  | 20.9 (5.7, 237)  | 22.3 (7.2, 124) | 20.5 (5, 215)    |
| <b>Recruitment</b>             |                 |                 |                 |                 |                |                 |                |                 |                  |                 |                  |                 |                 |                 |                  |                 |                  |
| <b>Clinic (Kiosk)</b>          | 19.5 (6.9, 91)  | 19.2 (6.4, 20)  | 17.5 (5.8, 55)  | 23.8 (2.8, 16)  | 26.3 (--, 1)   | 16.2 (4.8, 55)  | 17.3 (5, 74)   | 18.3 (6.2, 33)  | 15.8 (5.3, 80)   | 16.2 (6, 22)    | 13.9 (5.6, 158)  | 20.4 (7.3, 4)   | 14.2 (5.1, 158) | 15 (6.1, 40)    | 20.1 (4.2, 177)  | --              | 18.1 (4.7, 348)  |
| <b>Clinic (Flu VE Network)</b> | 21.9 (5.9, 55)  | 17.1 (5.3, 227) | 17.3 (4.5, 76)  | 22.7 (3.4, 28)  | 18.4 (4.4, 6)  | 16.5 (4.4, 150) | 19.3 (4.4, 35) | 16.3 (4.9, 100) | 19 (4.2, 348)    | 16 (4.6, 441)   | 16.8 (6.3, 13)   | 17.1 (6.3, 34)  | 14.4 (5, 152)   | 15.7 (4.6, 154) | 18.5 (4.8, 223)  | --              | 17.4 (3.6, 383)  |
| <b>Community</b>               | 23.7 (5.1, 386) | 17.3 (5.8, 163) | 18.2 (5.2, 295) | 24.7 (2.5, 22)  | 20.3 (6.3, 26) | 18.6 (5.8, 92)  | 19 (5.5, 48)   | 15.9 (6.1, 69)  | 20 (4.4, 309)    | 16.9 (5.6, 31)  | 17.6 (5, 250)    | 19.3 (6.2, 5)   | 18.5 (5.4, 82)  | 17.7 (5.5, 54)  | 18.6 (5.9, 3599) | 22 (7.4, 1389)  | 20.9 (5.4, 1775) |
| <b>Hospital (Residual)</b>     | 19.9 (6.4, 952) | 15.8 (6.6, 612) | 18.1 (5.8, 555) | 23.1 (3.3, 165) | 18.4 (6.5, 43) | 15.6 (5.6, 613) | 17.9 (6, 133)  | 14.9 (6.1, 495) | 16.3 (5.3, 1337) | 14.9 (6, 402)   | 13.3 (5.4, 1176) | 17.5 (6.9, 151) | 14.2 (5.9, 687) | 15.3 (6, 384)   | 19.1 (5.4, 3268) | 16.9 (7.8, 310) | 18.4 (5.1, 3787) |

**Figure 1:** Ct distribution across age groups for each pathogen. Large dots represent mean values, each small dot represents the Ct value for one sample. Ct values range up to a maximum cycle of 28, except for SARS-CoV-2, for which the Taqman qPCR assay used ranged up to 40. Note that 146 (8.6% of total) SARS-CoV-2 Crt observations made using the OpenArray assay are not shown here to maintain consistency. We note that numerical Ct comparisons are meant to be within a target (across age) and not between targets.

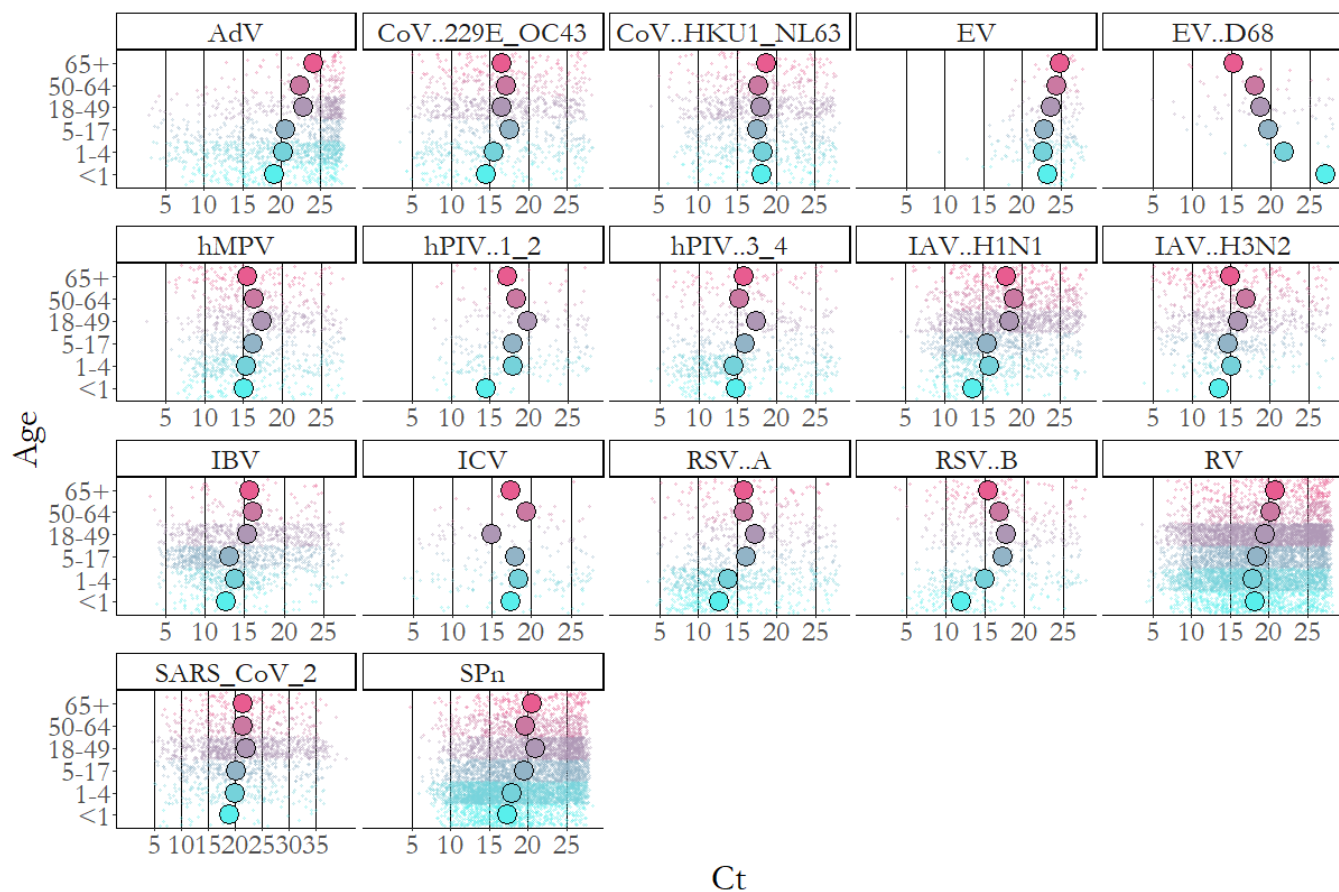

**Figure 2:** Total positive samples by week over the study period (top), and positive samples per week as a percentage of total weekly positive samples (bottom).

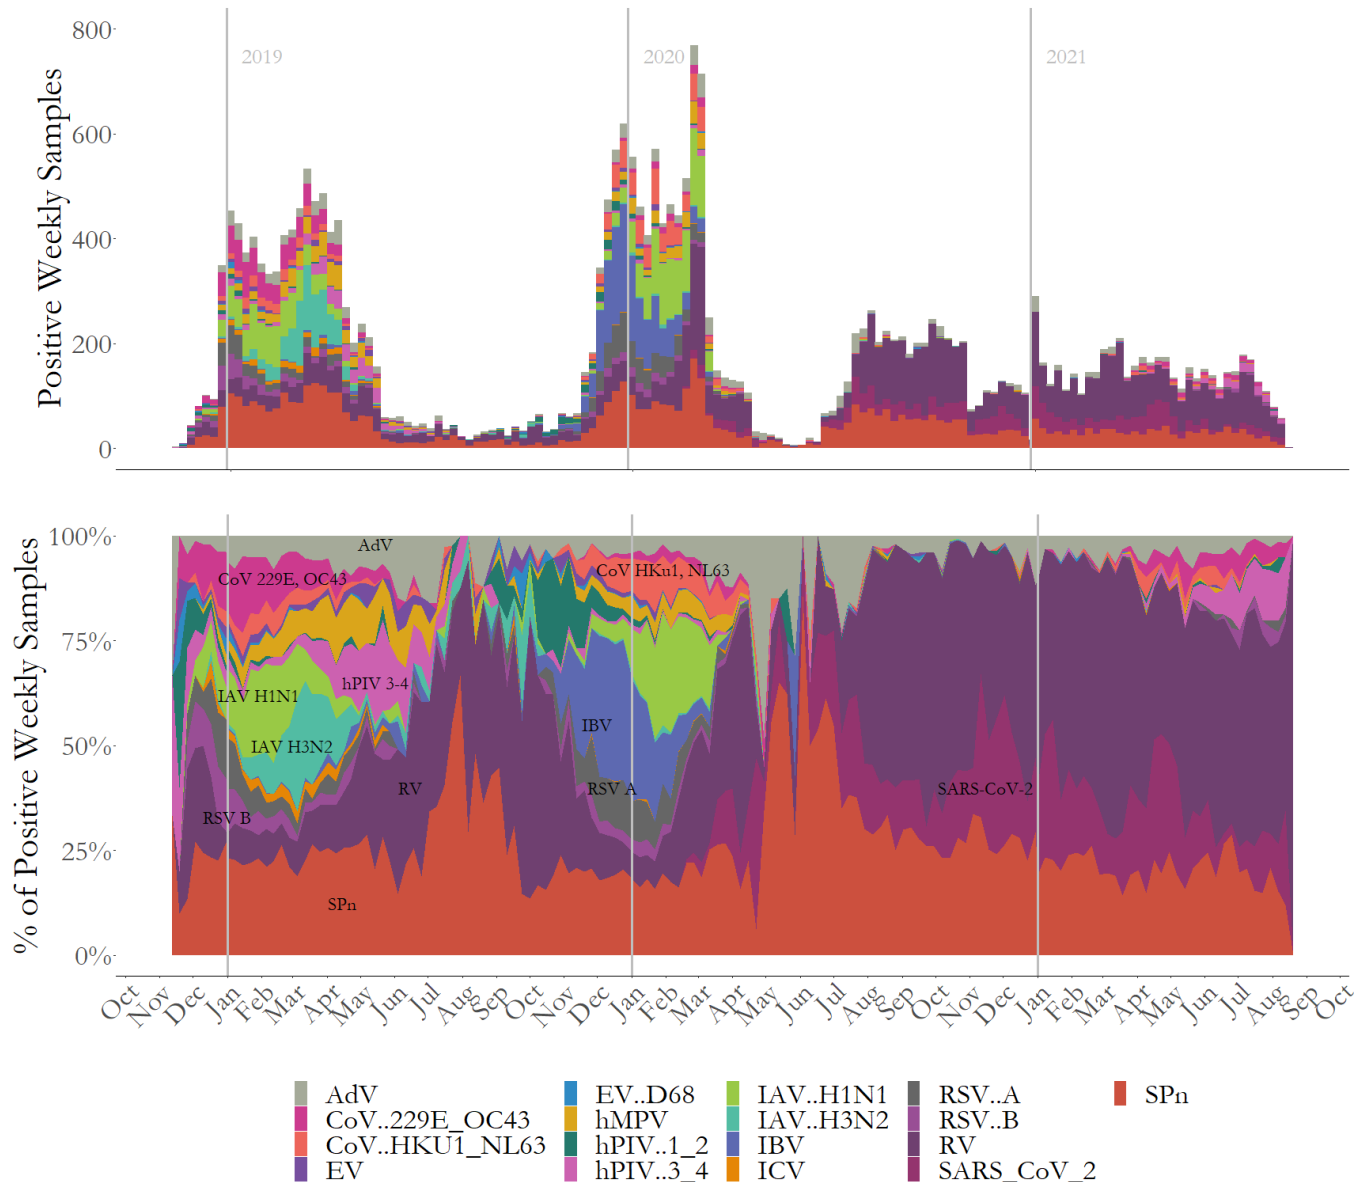

**Figure 3:** Adjusted Ct difference associated with each pathogen-pathogen pair, as well as average effects over all viruses (shown on margins). Colors reflect differences in Ct, with blues indicating an increase associated with interaction (suggesting interference), and reds indicating a decrease (suggesting facilitation). The large number in each square represents the average difference in Ct for mono- versus co-infections. The small number at the corner of each square represents the number of co-infected specimens in the sample. Stars (\*) represent statistically significant Ct differences ( $p < 0.01$ ). Pairs with fewer than 10 mono- or co-infected specimens were excluded. The first column and bottom row represent the average effects over all viruses. Full regression results summarized in this figure are available in the **Supplementary Data**.

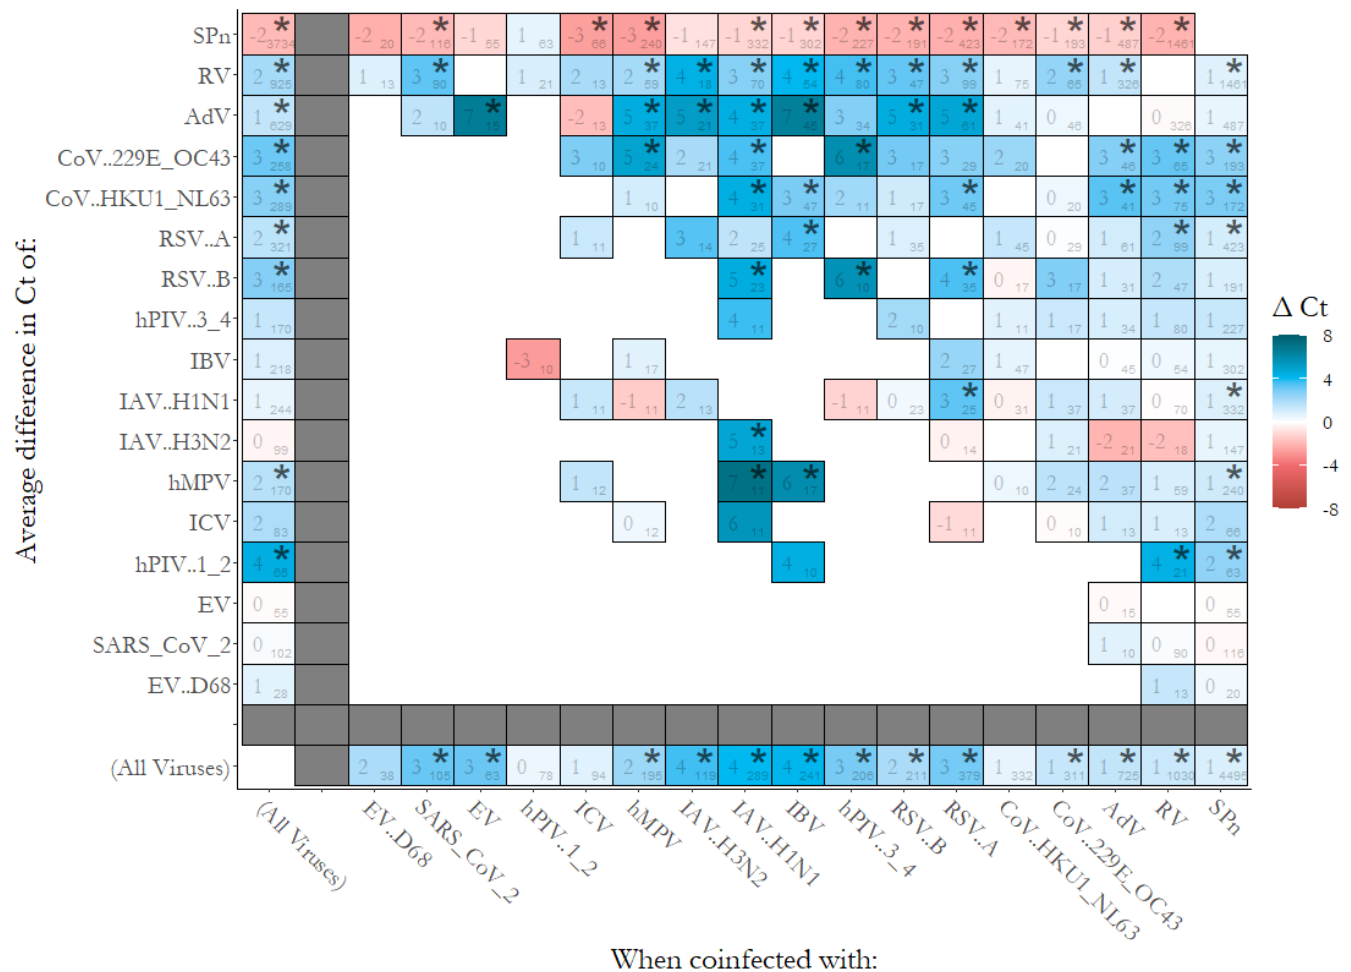

## Discussion

This study of 140 pairs of coinfections lends new empirical evidence on the dynamics of interspecies pathogen-pathogen interactions. We found no virus-virus pairs with evidence of facilitation -- where viral coinfection is associated with increased viral load relative to single infection -- but we found many suggestive of interference or competition -- where viral coinfection reduces viral load. In contrast, most viral→*SPn* coinfections were associated with significant increases in pneumococcal detection, suggestive of facilitation. These two broad findings generally conform with the existing body of evidence.<sup>8</sup> Our results offer a wide-ranging survey that can serve to generate hypotheses for further research, particularly for pathogen pairs with little or no existing prior study.

Influenza A and B are the most potent suppressors of other viral infections in our study. Without exception, influenza coinfection reduced the viral load of co-infecting viruses, significantly so in 14 of 21 pairs with sufficient data to quantify. The effect was much weaker and rarer in the opposite direction. This finding suggests important directional distinctions which may not be independent of infection ordering and are likely mediated by virus-specific immune responses. For example, in a recent experiment in porcine tracheal epithelial cells, Peng and colleagues<sup>14</sup> report 3-day prior influenza infection blocked coronavirus infection, while prior coronavirus infection had little effect on influenza replication. With the possible advent of more effective influenza vaccines, it will become important to monitor the impact on RSV, SARS-CoV-2, and other pathogens to mitigate possible unexpected shifts in overall burden and age distribution of other respiratory diseases.

A consistent increase in upper respiratory pneumococcal density associated with the presence of viral coinfectors has epidemiological and clinical implications. *SPn* is known to be commonly carried on the mucosal surface of the upper respiratory tract, but can cause severe disease when it becomes systemic and/or invades the lungs and other sterile sites.<sup>39</sup> Innate immune responses to viral infections, particularly IAV, have been shown to increase bacterial adherence, colonization, and invasion, promoting disease and increasing *SPn* shedding, thus promoting onward transmission.<sup>10,15,19,40–42</sup> Recent surveillance data from Israel shows that in the absence of circulating respiratory viruses during the COVID-19 pandemic, carriage remained relatively steady while pneumococcal disease declined.<sup>43</sup> Likewise, we detected *SPn* in many samples throughout the COVID-19 pandemic (**Figure 2**), but found higher average density in samples with more viral coinfections at both individual (**Supplemental Figure 3**) and population levels (**Supplemental Figure 4**). Surprisingly, compared to most other viral coinfectors, the IAV → *SPn* relationship was among the weakest, suggesting potentially that other viral coinfectors may have a stronger facilitating relationships with *SPn*. This could be in part explained by our concurrent findings that IAV is associated with suppression of most other viruses (**Figure 1**), and that *SPn* replication is greater where more viruses are present (**Supplemental Figure 4**). Furthermore, and contrary to recent evidence,<sup>44,45</sup> we did not observe a mutually facilitating relationship between IAV or any other virus and *SPn*.

Because of the dramatic effects of COVID-19 mitigation measures on all other respiratory pathogens, we only have sufficient sample sizes to characterize SARS-CoV-2 interactions between RV, AdV, and *SPn*. We found evidence to suggest that SARS-CoV-2 suppressed RV infection, with no additional evidence of interaction contrariwise. This finding contradicts recent studies which found an inhibiting effect of innate immune response to RV on SARS-CoV-2 infection.<sup>46,47</sup> Among samples in our study, it is interesting to contrast our finding with the significant suppression of the hCoV family by RV coinfection. We speculate that prior immunity may be a deciding factor in the strength of RV:coronavirus

competition. With only five endemic human coronaviruses compared with hundreds of endemic RV serotypes, the most common interaction may be coinfection with a RV serotype that the host is naive to and a coronavirus with some preexisting adaptive immunity. Prior adaptive immunity likely reduces peak viral load, and so we speculate that the ability of hCoV to interfere with RV is also lower, and the ability of RV to interfere with hCoV may be higher. This hypothesized effect of prior immunity for RV relative to SARS-CoV-2 could also explain the directional absence of impact from RV on SARS-CoV-2 observed in this study that contrasts with *in vivo* observations, and predicts that RV→SARS-CoV-2 interference may become more epidemiologically relevant in the future. Beyond the ecological interest in further studying this interaction, it may be informative about the role of population-level innate immune stimulation and/or within-host resource competition with other viruses for SARS-CoV-2 mitigation.<sup>48,49</sup> Such competition has also been demonstrated between oral polio vaccine and influenza,<sup>50</sup> and it thus may be an important generic concept for future pandemic suppression.

We designed our analysis to mitigate Berkson's bias/collider bias<sup>28,51</sup> which affects all previous analyses of pathogen interaction based on multiple pathogen testing.<sup>13,52–54</sup> Collider bias arises in this case due to studying symptomatic cases only, which enriches for positive samples.<sup>29</sup> This reduces the number of pathogen-negative specimens in the sample relative to the general population, and yields biased inference on a 2x2 co-occurrence table that is sensitive to prevalence and pathogen-specific and pathogen-interaction effects on symptomatology. While this issue has generally gone unrecognized in the literature, Nickbakhsh and colleagues<sup>55</sup> explicitly attempted to mitigate it by limiting their analysis to virus-positive samples only. However, this meant that the 'unexposed' group was composed of samples positive for any virus other than the two of interest, yielding an analysis that is only interpretable relative to and highly sensitive to the composition of pathogens which were tested for and their prevalence. In contrast, our approach was based on comparing the density of genetic material from each pathogen when detected as mono-infections versus coinfections, and thus mitigating bias arising from under-inclusion of uninfected samples. While similar analyses have been conducted on smaller datasets,<sup>40,56</sup> to the best of our knowledge, the present study is the most resolved and extensive yet in terms of specific pathogen-pathogen pair comparisons.

Like all studies, ours is subject to several limitations. First, for multiplex PCR assays that target more than one distinct pathogen, strain, or serotype (e.g. CoVs, AdV, RV, hPIVs, EV, *SPn*), our analysis could average over important heterogeneities in how each interacts with the other pathogens. RV is of particular concern as it comprises 3 species representing over 150 genotypes, with varying qPCR amplification efficiencies, resulting in inconsistent quantification of RV RNAs.<sup>57</sup> As such, our results for RV could be sensitive to the genotypes circulating during this study. Second, several swab types were used over the study period without this data always collected and thus could not be directly adjusted in the analysis. We expect swab type leads to extra unexplained variation in Ct values but is unlikely to bias results as it is not associated with the exposure or outcome of interest. Third, infection and test timing, sequence, and inoculum size, are critical components of interaction dynamics,<sup>14,58,59</sup> none of which we could observe or control for in this analysis; the lack of sequential sampling in our study also prohibits analysis of Ct changes in individuals over time. Future experimental, longitudinal, and modeling studies should be conducted to elucidate these factors. Fourth, while we included an extensive panel of 17 pathogens, it is possible that mono-infected individuals in our study are infected with unmeasured pathogens. Fifth, to the extent that pathogen load is correlated with symptomatology, we may be selecting for lower Ct values. This is a conservative bias, though, as it would affect both mono-infected and co-infected samples and would lead us to observe smaller differences in mean Ct.

Fifth, we cannot draw specific conclusions about transmissibility, disease severity, or symptom aetiology during coinfection as differences in Ct may correlate differently to relevant clinical parameters across pathogens and individuals.<sup>60</sup> It is possible the association between aetiology and recruitment could act as another uncontrolled source of sampling bias. For example, X is more likely to lead to hospitalization than Y, Y may appear as a weaker ‘innocent bystander’ in coinfecting samples; more experimental data is needed to fully understand these dynamics.

As multiplex PCR becomes cheaper, faster, and more available, its use as a clinical tool will increase dramatically. Future work should encompass understanding the clinical severity of specific pathogen-pathogen coinfections, which will be useful at the bedside for identifying high-risk combinations. With increasing ability to understand exactly the causes of infection, future vaccine development and implementation, treatments, and public health priorities could be tailored and thus reduce the extreme burden of respiratory infections affecting billions of individuals worldwide.



## Research in Context

### *Evidence before this study*

Evidence for interactions among respiratory pathogens has been typically limited to laboratory experiments involving animal or human cell models. These studies elucidate mechanisms but are typically limited in scope to one-on-one interactions. Multiplex PCR results from clinical datasets have been increasingly used to detect anomalies in the frequency of co-detection among pathogen pairs. Such studies benefit from larger sample sizes, and expanded scopes across many co-circulating pathogens, though relative risks of co-detection are biased in clinical samples due to Berkson's bias, a form of selection bias where the uninfected are under-represented. We searched "viral co-occurrence" and "viral co-detection" and in PubMed and Google Scholar and only identified one paper which identified and attempted to address this selection bias.

### *Added value of this study*

To our knowledge, our study of respiratory pathogen interactions is the largest yet in terms of sample size and scope, with 21,686 cases across 17 pathogen groups. We developed an approach to detecting interactions that was not based on co-occurrence, but rather on pathogen load among positive samples, thus mitigating the effect of Berkson's bias. Our study produced new statistical evidence for interactions among 140 pathogen pairs. We found no instances of increased viral load during viral-viral co-detection. Among other results, we found that influenza A and B were commonly associated with low viral load of co-infecting viruses, while there was little evidence that other viruses act to interfere with influenza.

### *Implications of all the available evidence*

Our study confirmed previous observations of viral infections leading to increased pneumococcal density, and broad viral-viral interference. The interspecific findings of our analyses add further nuance to these general understandings, to be further interpreted alongside experimental evidence. Past evidence generated from co-detection analyses may need to be reinvestigated as it is highly likely affected by selection bias. As multipathogen surveillance becomes ubiquitous, a richer understanding of coinfectin dynamics will be useful for clinical and epidemiological risk assessment.

## References

1. Singer M. Pathogen-pathogen interaction: a syndemic model of complex biosocial processes in disease. *Virulence*. 2010 Feb;1(1):10–8.
2. Bosch AATM, Biesbroek G, Trzcinski K, Sanders EAM, Bogaert D. Viral and Bacterial Interactions in the Upper Respiratory Tract. Hobman TC, editor. *PLoS Pathog*. 2013 Jan 10;9(1):e1003057.
3. DaPalma T, Doonan BP, Trager NM, Kasman LM. A systematic approach to virus–virus interactions. *Virus Res*. 2010 Apr;149(1):1–9.
4. Meskill SD, O'Bryant SC. Respiratory Virus Co-infection in Acute Respiratory Infections in Children. *Curr Infect Dis Rep*. 2020 Jan;22(1):3.

5. Opatowski L, Baguelin M, Eggo RM. Influenza interaction with cocirculating pathogens and its impact on surveillance, pathogenesis, and epidemic profile: A key role for mathematical modelling. Hobman TC, editor. PLOS Pathog. 2018 Feb 15;14(2):e1006770.
6. Kumar N, Sharma S, Barua S, Tripathi BN, Rouse BT. Virological and Immunological Outcomes of Coinfections. Clin Microbiol Rev. 31(4):e00111-17.
7. McCullers JA. The co-pathogenesis of influenza viruses with bacteria in the lung. Nat Rev Microbiol. 2014 Apr;12(4):252–62.
8. Shrestha S, Foxman B, Weinberger DM, Steiner C, Viboud C, Rohani P. Identifying the Interaction Between Influenza and Pneumococcal Pneumonia Using Incidence Data. Sci Transl Med. 2013 Jun 26;5(191):191ra84-191ra84.
9. Yoon YK, Yang KS, Sohn JW, Lee CK, Kim MJ. Impact of preceding respiratory viral infections on the clinical severity of patients with pneumococcal pneumonia. Influenza Other Respir Viruses. 2014;8(5):549–56.
10. Karppinen S, Teräsjarvi J, Auranen K, Schuez-Havupalo L, Siira L, He Q, et al. Acquisition and Transmission of *Streptococcus pneumoniae* Are Facilitated during Rhinovirus Infection in Families with Children. Am J Respir Crit Care Med. 2017 Nov;196(9):1172–80.
11. Sid H, Hartmann S, Petersen H, Ryll M, Rautenschlein S. Mycoplasma gallisepticum modifies the pathogenesis of influenza A virus in the avian tracheal epithelium. Int J Med Microbiol. 2016 May 1;306(3):174–86.
12. Bellinghausen C, Gulraiz F, Heinzmann ACA, Dentener MA, Savelkoul PHM, Wouters EF, et al. Exposure to common respiratory bacteria alters the airway epithelial response to subsequent viral infection. Respir Res. 2016 Jun 3;17(1):68.
13. Wu A, Mihaylova VT, Landry ML, Foxman EF. Interference between rhinovirus and influenza A virus: a clinical data analysis and experimental infection study. Lancet Microbe. 2020 Oct 1;1(6):e254–62.
14. Peng J-Y, Shin D-L, Li G, Wu N-H, Herrler G. Time-dependent viral interference between influenza virus and coronavirus in the infection of differentiated porcine airway epithelial cells. Virulence. 2021 Dec;12(1):1111–21.
15. Richard AL, Siegel SJ, Erikson J, Weiser JN. TLR2 Signaling Decreases Transmission of *Streptococcus pneumoniae* by Limiting Bacterial Shedding in an Infant Mouse Influenza A Co-infection Model. PLOS Pathog. 2014 Aug 28;10(8):e1004339.
16. Gonzalez AJ, Ijezie EC, Balemba OB, Miura TA. Attenuation of Influenza A Virus Disease Severity by Viral Coinfection in a Mouse Model. J Virol. 2018;92(23):21.
17. Chan KF, Carolan LA, Korenkov D, Druce J, McCaw J, Reading PC, et al. Investigating Viral Interference Between Influenza A Virus and Human Respiratory Syncytial Virus in a Ferret Model of Infection. J Infect Dis. 2018 Jul 2;218(3):406–17.
18. Nakamura S, Davis KM, Weiser JN. Synergistic stimulation of type I interferons during influenza virus coinfection promotes *Streptococcus pneumoniae* colonization in mice. J Clin Invest. 2011 Sep 1;121(9):3657–65.
19. Stark JM, Stark MA, Colasurdo GN, LeVine AM. Decreased bacterial clearance from the lungs of mice following primary respiratory syncytial virus infection. J Med Virol. 2006 Jun;78(6):829–38.
20. Goto H, Ihira H, Morishita K, Tsuchiya M, Ohta K, Yumine N, et al. Enhanced growth of influenza A virus by coinfection with human parainfluenza virus type 2. Med Microbiol Immunol (Berl). 2016 Jun;205(3):209–18.
21. Pinky L, Dobrovolsky HM. Coinfections of the Respiratory Tract: Viral Competition for Resources. Tripp R, editor. PLOS ONE. 2016 May 19;11(5):e0155589.
22. Rohani P, Earn DJ, Finkenstädt B, Grenfell BT. Population dynamic interference among childhood diseases. Proc R Soc Lond B Biol Sci. 1998 Nov 7;265(1410):2033–41.
23. Huang Y, Rohani P. Age-structured effects and disease interference in childhood infections. Proc R Soc B Biol Sci. 2006 May 22;273(1591):1229–37.
24. Waterlow NR, Flasche S, Minter A, Eggo RM. Competition between RSV and influenza: Limits of

- modelling inference from surveillance data. *Epidemics*. 2021 Jun 1;35:100460.
25. Hébert-Dufresne L, Althouse BM. Complex dynamics of synergistic coinfections on realistically clustered networks. *Proc Natl Acad Sci*. 2015 Aug 18;112(33):10551–6.
  26. Casalegno JS, Ottmann M, Bouscambert Duchamp M, Escuret V, Billaud G, Frobert E, et al. Rhinoviruses delayed the circulation of the pandemic influenza A (H1N1) 2009 virus in France. *Clin Microbiol Infect*. 2010 Apr;16(4):326–9.
  27. Greer RM, McErlean P, Arden KE, Faux CE, Nitsche A, Lambert SB, et al. Do rhinoviruses reduce the probability of viral co-detection during acute respiratory tract infections? *J Clin Virol*. 2009 May;45(1):10–5.
  28. Berkson J. Limitations of the Application of Fourfold Table Analysis to Hospital Data. *Biom Bull*. 1946;2(3):47–53.
  29. Munafò MR, Tilling K, Taylor AE, Evans DM, Davey Smith G. Collider scope: when selection bias can substantially influence observed associations. *Int J Epidemiol*. 2018 Feb 1;47(1):226–35.
  30. Nickbakhsh S, Mair C, Matthews L, Reeve R, Johnson PCD, Thorburn F, et al. Virus–virus interactions impact the population dynamics of influenza and the common cold. *Proc Natl Acad Sci*. 2019 Dec 26;116(52):27142–50.
  31. Chung E, Chow EJ, Wilcox NC, Burstein R, Brandstetter E, Han PD, et al. Comparison of Symptoms and RNA Levels in Children and Adults With SARS-CoV-2 Infection in the Community Setting. *JAMA Pediatr* [Internet]. 2021 Jun 11 [cited 2021 Jul 14]; Available from: <https://jamanetwork.com/journals/jamapediatrics/fullarticle/2780963>
  32. Chu HY, Boeckh M, Englund JA, Famulare M, Lutz B, Nickerson DA, et al. The Seattle Flu Study: a multiarm community-based prospective study protocol for assessing influenza prevalence, transmission and genomic epidemiology. *BMJ Open*. 2020 Oct 1;10(10):e037295.
  33. [PREPRINT] Kim AE, Brandstetter E, Graham C, Heimonen J, Osterbind A, McCulloch DJ, et al. Seattle Flu Study - Swab and Send: Study Protocol for At-Home Surveillance Methods to Estimate the Burden of Respiratory Pathogens on a City-Wide Scale. *medRxiv*. 2020 Mar 7;2020.03.04.20031211.
  34. Field N, Cohen T, Struelens MJ, Palm D, Cookson B, Glynn JR, et al. Strengthening the Reporting of Molecular Epidemiology for Infectious Diseases (STROME-ID): an extension of the STROBE statement. *Lancet Infect Dis*. 2014 Apr 1;14(4):341–52.
  35. von Elm E, Altman DG, Egger M, Pocock SJ, Gøtzsche PC, Vandenbroucke JP. The Strengthening of Reporting of Observational Studies in Epidemiology (STROBE) Statement: Guidelines for Reporting Observational Studies. *Ann Intern Med*. 2007 Oct 16;147(8):573–7.
  36. ThermoFisher. A complete workflow solution for detecting respiratory tract microbiota using TaqMan Array Cards [Internet]. Available from: <https://assets.thermofisher.com/TFS-Assets/GSD/Application-Notes/openarray-respiratory-microbiota-taqman-app-note.pdf>
  37. ThermoFisher. Crt a relative threshold method for qPCR data analysis on the QuantStudio 12K Flex system with OpenArray technology [Internet]. Available from: [https://tools.thermofisher.com/content/sfs/brochures/CO28730-Crt-Tech-note\\_FLR.pdf](https://tools.thermofisher.com/content/sfs/brochures/CO28730-Crt-Tech-note_FLR.pdf)
  38. Kim AE, Brandstetter E, Wilcox N, Heimonen J, Graham C, Han PD, et al. Evaluating Specimen Quality and Results from a Community-Wide, Home-Based Respiratory Surveillance Study. *J Clin Microbiol*. 2021 Apr 20;59(5).
  39. Weiser JN, Ferreira DM, Paton JC. *Streptococcus pneumoniae*: transmission, colonization and invasion. *Nat Rev Microbiol*. 2018 Jun;16(6):355–67.
  40. Wolter N, Tempia S, Cohen C, Madhi SA, Venter M, Moyes J, et al. High Nasopharyngeal Pneumococcal Density, Increased by Viral Coinfection, Is Associated With Invasive Pneumococcal Pneumonia. *J Infect Dis*. 2014 Nov 15;210(10):1649–57.
  41. Kukavica-Ibrulj I, Hamelin M-È, Prince GA, Gagnon C, Bergeron Y, Bergeron MG, et al. Infection with Human Metapneumovirus Predisposes Mice to Severe Pneumococcal Pneumonia. *J Virol*. 2009 Feb 1;83(3):1341–9.

42. Lai S-H, Liao S-L, Wong K-S, Lin T-Y. Preceding human metapneumovirus infection increases adherence of *Streptococcus pneumoniae* and severity of murine pneumococcal pneumonia. *J Microbiol Immunol Infect*. 2016 Apr 1;49(2):216–24.
43. [PREPRINT] Danino D, Ben-Shimol S, Beek BA van der, Givon-Lavi N, Avni YS, Greenberg D, et al. Decline in pneumococcal disease in young children during the COVID-19 pandemic associated with suppression of seasonal respiratory viruses, despite persistent pneumococcal carriage: A prospective cohort study. *medRxiv*. 2021 Aug 1;2021.07.29.21261308.
44. Short KR, Habets MN, Hermans PWM, Diavatopoulos DA. Interactions between *Streptococcus pneumoniae* and influenza virus: a mutually beneficial relationship? *Future Microbiol*. 2012 May;7(5):609–24.
45. Verkaik NJ, Nguyen DT, de Vogel CP, Moll HA, Verbrugh HA, Jaddoe VVW, et al. *Streptococcus pneumoniae* exposure is associated with human metapneumovirus seroconversion and increased susceptibility to in vitro HMPV infection. *Clin Microbiol Infect*. 2011 Dec 1;17(12):1840–4.
46. Cheemarla NR, Watkins TA, Mihaylova VT, Wang B, Zhao D, Wang G, et al. Dynamic innate immune response determines susceptibility to SARS-CoV-2 infection and early replication kinetics. *J Exp Med* [Internet]. 2021 Jun 15 [cited 2021 Jun 17];218(8). Available from: <https://doi.org/10.1084/jem.20210583>
47. Dee K, Goldfarb DM, Haney J, Amat JAR, Herder V, Stewart M, et al. Human rhinovirus infection blocks SARS-CoV-2 replication within the respiratory epithelium: implications for COVID-19 epidemiology. *J Infect Dis*. 2021 Mar 23;jjab147.
48. Chumakov K, Avidan MS, Benn CS, Bertozzi SM, Blatt L, Chang AY, et al. Old vaccines for new infections: Exploiting innate immunity to control COVID-19 and prevent future pandemics. *Proc Natl Acad Sci* [Internet]. 2021 May 25 [cited 2021 Jul 16];118(21). Available from: <https://www.pnas.org/content/118/21/e2101718118>
49. Kolodny O, Berger M, Feldman MW, Ram Y. A new perspective for mitigation of SARS-CoV-2 infection: priming the innate immune system for viral attack. *Open Biol*. 10(7):200138.
50. Chumakov MP, Voroshilova MK, Antsupova AS, Bořko VM, Blinova MI, Priimiagi LS, et al. [Live enteroviral vaccines for the emergency nonspecific prevention of mass respiratory diseases during fall-winter epidemics of influenza and acute respiratory diseases]. *Zh Mikrobiol Epidemiol Immunobiol*. 1992 Jan 1;(11–12):37–40.
51. Griffith GJ, Morris TT, Tudball MJ, Herbert A, Mancano G, Pike L, et al. Collider bias undermines our understanding of COVID-19 disease risk and severity. *Nat Commun*. 2020 Nov 12;11(1):5749.
52. Casalegno JS, Ottmann M, Bouscambert Duchamp M, Escuret V, Billaud G, Frobert E, et al. Rhinoviruses delayed the circulation of the pandemic influenza A (H1N1) 2009 virus in France. *Clin Microbiol Infect*. 2010 Apr;16(4):326–9.
53. Greer RM, McErlean P, Arden KE, Faux CE, Nitsche A, Lambert SB, et al. Do rhinoviruses reduce the probability of viral co-detection during acute respiratory tract infections? *J Clin Virol*. 2009 May;45(1):10–5.
54. Nolan VG, Arnold SR, Bramley AM, Ampofo K, Williams DJ, Grijalva CG, et al. Etiology and Impact of Coinfections in Children Hospitalized With Community-Acquired Pneumonia. *J Infect Dis*. 2018 Jun 20;218(2):179–88.
55. Nickbakhsh S, Mair C, Matthews L, Reeve R, Johnson PCD, Thorburn F, et al. Virus–virus interactions impact the population dynamics of influenza and the common cold. *Proc Natl Acad Sci*. 2019 Dec 26;116(52):27142–50.
56. Martin ET, Kuypers J, Wald A, Englund JA. Multiple versus single virus respiratory infections: viral load and clinical disease severity in hospitalized children: Viral coinfection in children. *Influenza Other Respir Viruses*. 2012 Jan;6(1):71–7.
57. Sedlak RH, Nguyen T, Palileo I, Jerome KR, Kuypers J. Superiority of Digital Reverse Transcription-PCR (RT-PCR) over Real-Time RT-PCR for Quantitation of Highly Divergent Human Rhinoviruses. McAdam AJ, editor. *J Clin Microbiol*. 2017 Feb;55(2):442–9.
58. Shrestha S, Foxman B, Dawid S, Aiello AE, Davis BM, Berus J, et al. Time and dose-dependent

- risk of pneumococcal pneumonia following influenza: a model for within-host interaction between influenza and *Streptococcus pneumoniae*. *J R Soc Interface*. 2013 Sep 6;10(86):20130233.
59. Davis BM, Aiello AE, Dawid S, Rohani P, Shrestha S, Foxman B. Influenza and Community-acquired Pneumonia Interactions: The Impact of Order and Time of Infection on Population Patterns. *Am J Epidemiol*. 2012 Mar 1;175(5):363–7.
  60. Wishaupt JO, Ploeg T van der, Smeets LC, Groot R de, Versteegh FGA, Hartwig NG. Pitfalls in interpretation of CT-values of RT-PCR in children with acute respiratory tract infections. *J Clin Virol*. 2017 May 1;90:1–6.

### ***Supplementary Information***

- Table of regression results
- Table of sample sizes by recruitment site
- Supplementary Figures
  - 1. Sensitivity analysis: Results if only single co-infections were included
  - 2. Age and recruitment distributions of coinfections
  - 3. Crt versus number of coinfectors by pathogen
  - 4. *SPn* positivity versus number of viral coinfections in the population over time
  - 5. Sample exclusions flow diagram

**Supplementary Data:** Full regression model results for each interaction summarized in Main Figure 3. Includes results for an unadjusted effect and the full model which adjusts for month, age, and recruitment mode.

<https://docs.google.com/spreadsheets/d/1RfSaEnRhTuwOf5AEPB-blapupCr4DIlpCvvZBvwEskM/edit?usp=sharing>

**Supplementary Table 1:** Number of samples by recruitment site

| <b>Recruitment Type</b>        | <b>Site</b>                                     | <b>Sample Size</b> |
|--------------------------------|-------------------------------------------------|--------------------|
| <b>Clinic (Kiosk)</b>          | <b>ChildrensHospitalSeattle</b>                 | 621                |
|                                | <b>ChildrensHospitalSeattleOutpatientClinic</b> | 168                |
|                                | <b>UWHallHealth</b>                             | 43                 |
|                                | <b>UWSeaMar</b>                                 | 40                 |
|                                | <b>PioneerSquare</b>                            | 27                 |
|                                | <b>ChildrensHospitalBellevue</b>                | 25                 |
|                                | <b>ChildrensSeaMar</b>                          | 16                 |
| <b>Clinic (Flu VE Network)</b> | <b>KaiserPermanente</b>                         | 1931               |
| <b>Community</b>               | <b>SCAN</b>                                     | 5720               |
|                                | <b>swabNSend</b>                                | 1347               |
|                                | <b>WestlakeMall</b>                             | 153                |
|                                | <b>HUB</b>                                      | 100                |
|                                | <b>UWSuzzalloLibrary</b>                        | 83                 |
|                                | <b>HarborviewLobby</b>                          | 81                 |
|                                | <b>FredHutchLobby</b>                           | 69                 |
|                                | <b>SeattleCenter</b>                            | 12                 |
|                                | <b>CapitolHillLightRailStation</b>              | 12                 |
|                                | <b>Harborview</b>                               | 10                 |
|                                | <b>UWGreek</b>                                  | 10                 |
|                                | <b>ColumbiaCenter</b>                           | 6                  |
|                                | <b>HealthSciencesRotunda</b>                    | 5                  |
|                                | <b>Costco</b>                                   | 5                  |
|                                | <b>UWClub</b>                                   | 5                  |
| <b>KingStreetStation</b>       | 4                                               |                    |
| <b>SeaTacInternational</b>     | 3                                               |                    |
| <b>UWReopeningSwabNSend</b>    | 3                                               |                    |

|                            |                                               |      |
|----------------------------|-----------------------------------------------|------|
|                            | <b>PICAWA</b>                                 | 2    |
|                            | <b>WestCampusChildCareCenter</b>              | 1    |
|                            | <b>SeaTacDomestic</b>                         | 1    |
|                            | <b>UWOdegaardLibrary</b>                      | 1    |
| <b>Hospital (Residual)</b> | <b>RetrospectiveChildren’sHospitalSeattle</b> | 7600 |
|                            | <b>RetrospectiveHarborview</b>                | 2000 |
|                            | <b>RetrospectiveNorthwest</b>                 | 982  |
|                            | <b>RetrospectiveUWMedicalCenter</b>           | 592  |





**Supplementary Figure 2:** Frequency of sample infections by age and recruitment type across 83,068 samples with complete metadata. Children and adolescents are more likely than adults to have one or more infections.

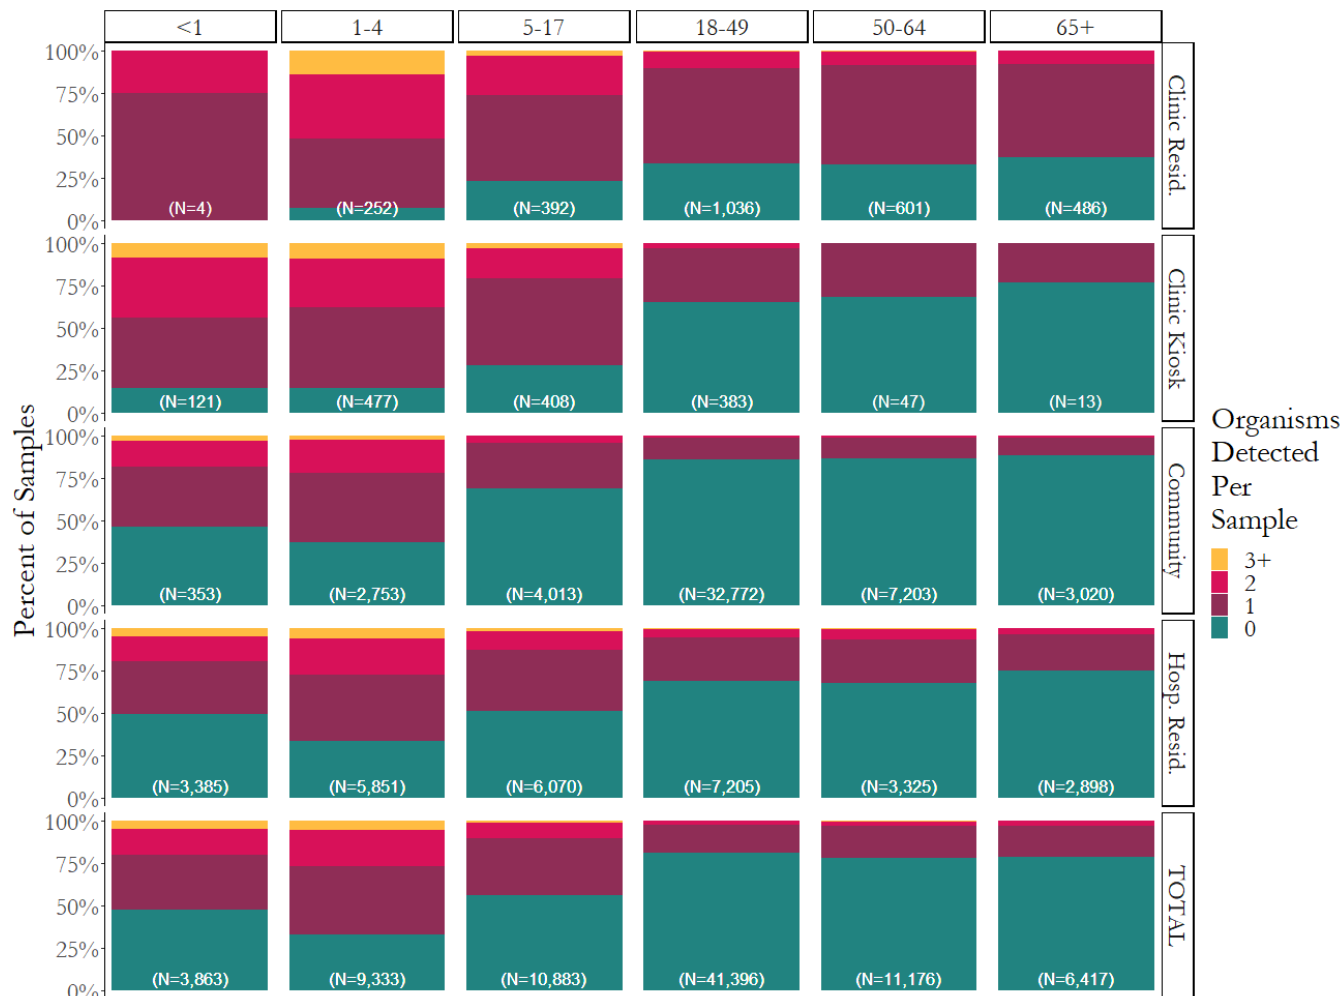

**Supplementary Figure 3:** Average Ct values by number of viral coinfections. Strong gradient observed for SPn, where more viral coinfectors are strongly associated with more bacterial replication in the upper respiratory tract.

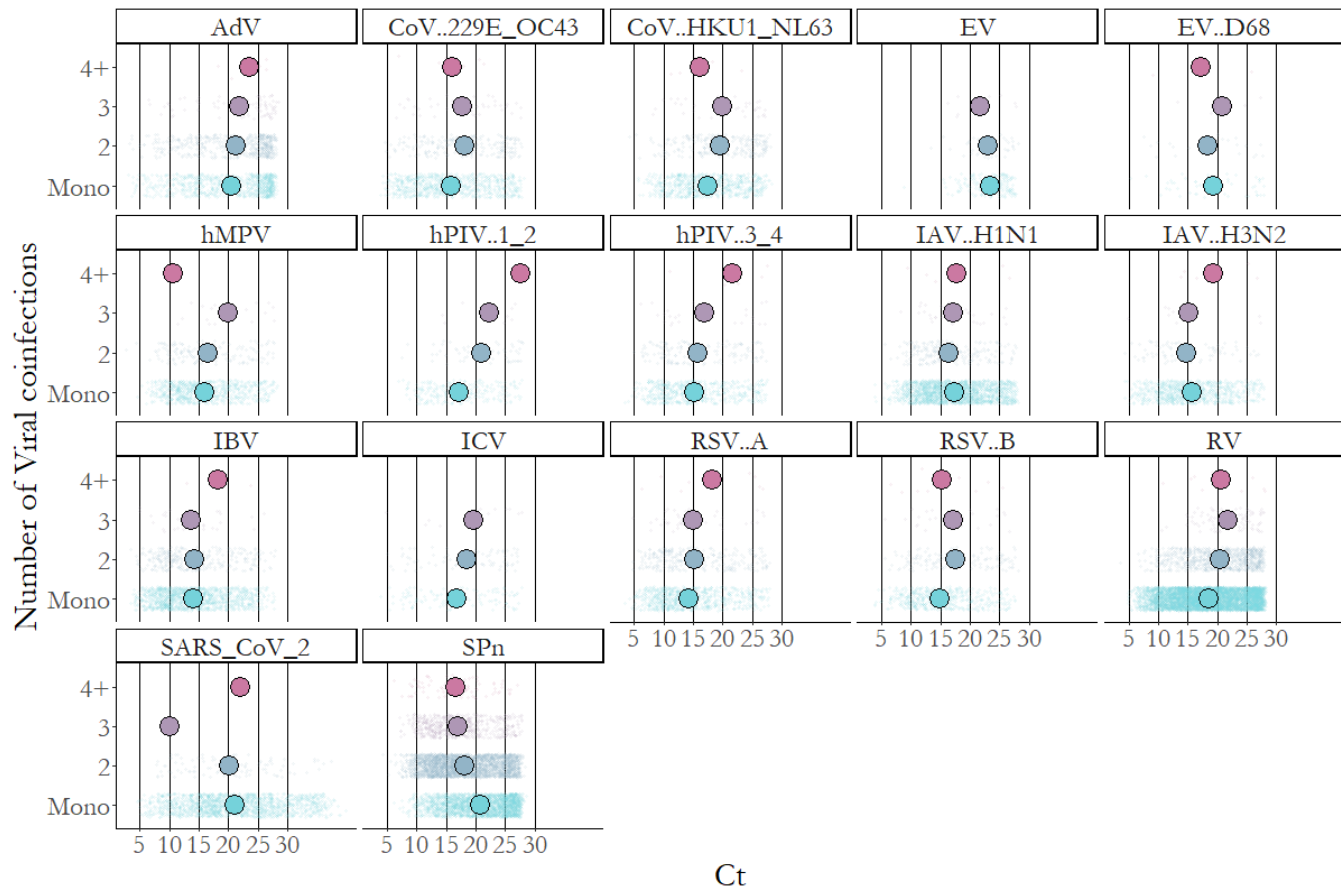

**Supplementary Figure 4:** Ecological association between average number of circulating viruses in a month and the average  $SP_n$  values for  $SP_n$  in community and hospital samples, suggesting population-level evidence for the individual-level interaction explored in this paper.

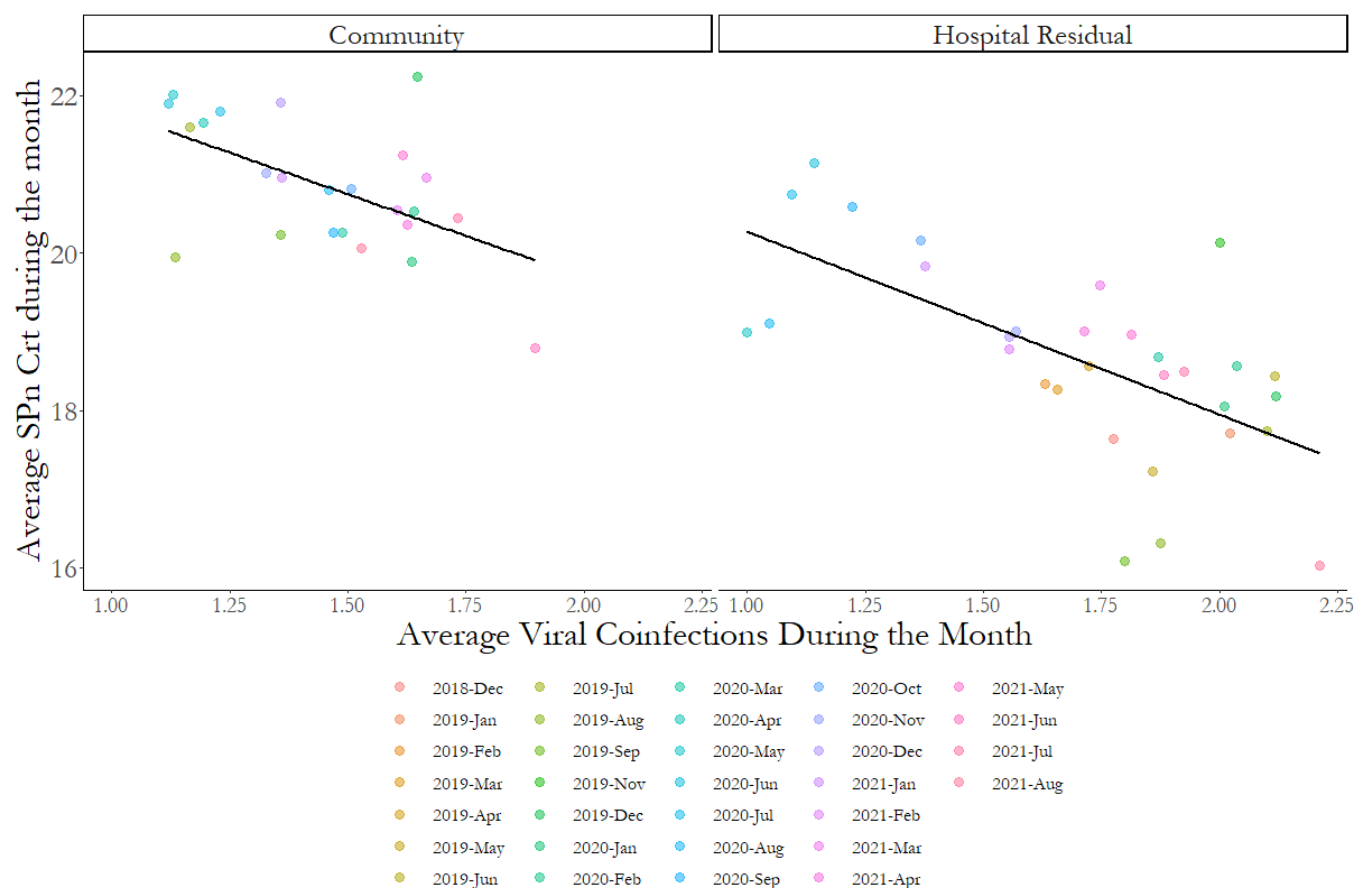

**Supplementary Figure 5: Sample exclusions**

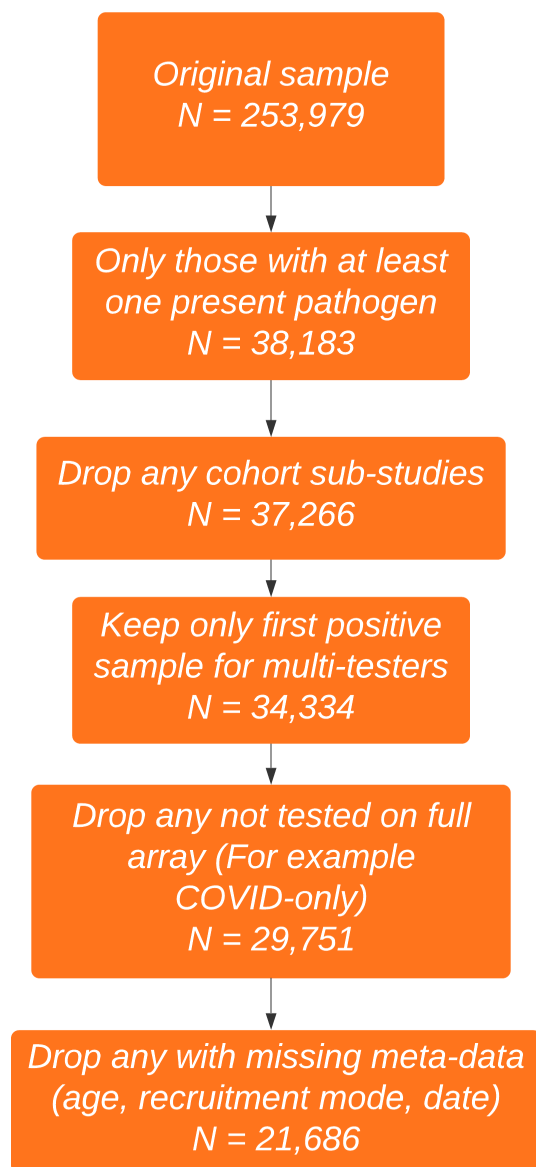

Source: https://medrxiv.org/content/10.1101/2022.02.04.22270474v1.full.pdf
